# Supplementary material for: Optimal Time for Bile Duct Injury Reconstruction. Early Does Not Mean Better: a Multicenter Retrospective Analysis of a Hepato-pancreatic-biliary Group
Source: Research Square preprint supplement (doi:10.21203/rs.3.rs-1344920/v1), 2022-03-08
Supplement: Supplementary file 2 [file 2d21190b02a528af7cb46feb.xlsx]

## Sheet: Hoja 1
CEDULA	GENERO 0 (F) 1 (M)	EDAD	IMC 0 (18.5 - 24.9) 1 (25 - 29.9) 2 (30 - 34.9) 3 (35 - 39.9) 4 (> 40)	HTA 0 (SI) 1 (NO)	DM 0 (SI) 1 (NO )	ABORDAJE CX 0. LAPAROSCOPICO 1. ABIERTA 2. CONVERTIDO	INDICACIÓN PRIMERA CX: COLECISTITIS 0 (NO ) 1(TOKIO 1) 2 (TOKIO 2) 3 (TOKIO 3)	DREN PRIMERA CX 0 (SI) 1 (NO)	HOSPITAL UNIVERSITARIO PRIMERA CX 0 (SI) 1 (NO)	ICTERICIA 0 (SI) 1 (NO)	COLANGITIS POST LX. 0 (SI) 1 (NO)	DOLOR ABDOMINAL 0 (SI) 1 (NO)	BILIOMA 0 (SI) 1 (NO)	DX. LESIÓN 0. INTRAOPERATORIO 1. POP TEMRPANO 24 - 72 H 2. POP TARDIO > 72 H	DX. INTRAOPERATORIO 0. NO 1. CIO 2. VISUALIZACIÓN DIRECTA	CONFIRMACIÓN IMAGENOLÓGICA DX. 0. ECOGRAFIA 1. COLANGIORMN 2. RMN CONTRASTADA 3. CT 4. CPRE 5. NO	BT	BD	FA	WBC	CREAT	INR	PTT	TIPO LX. STRASBERG 0. A 1. B 2 C 3. D 4. E1 5. E2 6. E3 7. E4 8 E5.	DURACIÓN CX. RECONSTRUCCIÓN (MIN).	TIEMPO DE RECONSTRUCCIÓN	TIPO CX 0. URGENCIA 1. PRIORITARIA 2. PROGRAMADO	ANT. QX ABDOMINAL PREVIOS 0. SI 1. NO	TIPO CX REINTERVENCIÓN . 0. LAVADO Y COLOCACIÓN DREN 1. HEPATICOYEYUNOSTOMÍA 2. COLEDOCOPLASTIA 3. EXPLORACIÒN VB CON CIERRE PRIMARIO 4. EXPLORACION VB + KERH 5. HEPP COUINAUD	REINTERVENCIÓN POST RECONSTRUCCIÓN 0. SI 1. NO	SANGRADO RECOSNTRUCCION ML	ESTANCIA EN UCI 0. SI 1 NO	DIAS EN UCI	SOPORTE VASOPRESOR 0. SI 1. NO	SOPORTE TRASFUSIONAL 0. SI 1. NO	ESTANCIA INTRAHOSPITALARIA (DIAS)	MORTALIDAD 24 HORAS 0. SI 1 NO	CLAVEN DINDO 0. 1 1. 2 2. 3A 3. 3B 4. 4A 5. 4B 6. 5	ESTENOSIS 1 AÑO POST CX. 0. SI 1 NO
51834361	0	52	0	1	1	2	0	1	0	1	1	0	0	0	1	1	0.39	0.27	141	11.03	0.57	1.14	26.1	4	125	2	1	1	1	1	100	1	0	1	1	4	1	1	1
1013577553	0	33	0	1	1	0	2	1	1	0	1	0	1	2	0	4	5.02	4.38	301	9.5	0.73	1.68	30.2	5	170	2	1	0	0	0	70	1	0	1	1	5	1	0	1
20621906	0	64	0	1	1	1	0	0	1	0	1	0	1	2	0	1	4.67	4.26	1575	37.3	0.86	1.8	30	6	318	2	2	0	1	1	300	1	0	1	1	6	1	0	1
1000986937	0	19	0	1	1	0	1	1	1	0	0	0	0	0	2	1	5.83	5.06	418	11	0.54	1.6	39	6	210	2	0	0	1	1	100	1	0	1	1	5	1	0	1
17046439	1	78	0	1	1	0	2	0	0	0	1	0	1	0	2	1	1.29	0.87	458	11.3	0.55	1.5	40	4	240	2	0	1	5	1	100	1	0	1	1	8	1	0	1
80130459	1	37	0	1	1	2	2	0	1	0	0	0	1	2	0	1	1.81	0.66	213	9.12	0.87	1.14	29	6	250	2	2	1	1	1	100	1	0	1	1	8	1	1	1
52472169	0	42	0	1	1	0	1	1	0	0	0	0	1	2	0	2	5.45	4.82	2225	11	0.63	5	76	6	325	2	0	0	1	1	300	1	0	0	1	7	1	2	1
1013595366	0	31	0	1	1	0	2	1	1	0	1	0	1	2	0	2	8.99	8.2	510	10	0.82	1.12	42	6	210	2	2	0	1	1	150	1	0	1	1	3	1	0	1
17081083	1	79	1	0	1	0	2	0	0	0	1	1	1	0	2	1	1.8	1.5	410	8.9	0.69	1.3	29	3	310	0	0	1	2	0	50	0	5	0	0	6	1	3	0
28479319	0	59	0	1	1	0	0	1	0	0	0	0	0	2	0	2	8.1	6.74	378	20	0.9	1.24	31	5	205	2	2	1	0	1	200	1	0	1	1	6	1	0	1
20155622	0	86	1	0	0	0	0	0	0	1	1	1	1	0	1	5	1.5	1.14	132	16	0.9	1.3	32	6	120	0	2	0	1	1	50	0	4	1	1	6	1	0	1
21070017	0	61	0	0	1	0	2	1	0	0	1	0	1	0	1	5	1.1.	0.8	354	11.6	2	0.9	28	4	150	2	2	1	1	1	0	1	0	1	1	5	1	0	1
3022225	1	70	0	0	1	0	3	0	0	0	0	0	0	0	2	1	2.5	2	192	16	1.7	1.32	27	2	180	2	2	1	0	0	200	0	4	1	1	20	1	0	1
1033754547	0	22	0	1	1	2	0	1	1	1	1	0	0	2	0	1	0.7	0.5	481	13.4	0.46	1.1	27	0	180	2	0	1	0	1	120	0	4	1	1	4	1	0	1
20472719	0	55	0	1	1	0	2	1	1	0	0	0	1	2	0	2	5.6	5	200	7	0.33	1.3	30	5	150	2	0	1	1	1	150	1	0	1	1	7	1	0	1
1075305857	0	18	0	1	1	0	0	0	1	0	1	0	1	2	0	2	20	15	444	4	0.4	1.4	29	6	180	2	0	1	1	1	100	1	0	1	1	4	1	0	1
29133072	0	78	1	0	1	2	2	0	0	1	1	1	1	0	2	5	0.5	0.4	200	15	0.4	1.2	23	7	100	0	0	1	2	1	100	1	0	1	1	6	1	0	1
20896494	0	54	1	1	1	0	2	1	1	0	1	0	1	2	0	1	11.2	9	297	12	0.6	1.1		6	120	2	0	1	1	1	50	1	0	1	1	4	1	0	1
79108675	1	56	0	1	1	2	2	0	1	1	1	1	1	0	2	5	0.81	0.68	229	17	0.66	1.9	33	5	180	1	1	1	1	1	100	1	0	1	0	16	1	1	0
70854479	1	45	1	0		0	3	1	1	0	1	0	1	2	2	4	12	10'	223	12.4	1.2	2		5	120	2	2	0	1	1		1	0	1	1	6	1	0	1
26259452	0	52	1	0	1	0	1	0	1	0	1	1	1	1	2	4	6	5.2	322	16.4.	0.9			4	90	2	2	0	1	1		1	0	1	1	5	1	0	1
1013666971	0	24	1	0	0	1	1	0	0	0	0	0	0	2	2	4	1.16	1.03		5.63	0.67			5	180	2	1	0	1	1	300	1	0	1	1	5	1	3	1
51772901	0	55	0	1	1	1	2	0	1	1	1	0	0	0	2	5	1.22	1.03		12.9	0.44			5	240	2	1	1	1	0	900	0	5	0	1	60	1	4	1
19417346	1	59	1	0	1	1	2	1	1	1	1	0	1	2	2	0	1.75	1.6		7.49	0.82			4	230	2	1	1	3	0	100	0	4	1	1	10	1	3	1
1070606789	0	28	1	1	1	1	2	1	1	1	1	0	1	2	2	5	1.3	1		8.52	1			3	250	2	1	1	3	1	100	1	0	1	1	6	1	3	1
1012384415	0	28	0	1	1	1	2	1	1	1	1	0	0	2	2	3	1.8	1.7		22.5	0.82			3	300	2	1	1	1	1	200	0	1	1	1	10	1	3	1
17001532	1	77	1	1	1	2	0	0	0	1	1	1	1	0	2	5	0.79	0.19	62	6.4	1.08	1.3	30.2	7	300	1	2	1	1	1	1100	1	0	1	1	9	1	3	1
4216256	1	60	0	0	1	2	2	0	1	0	1	1	1	2	0	1	15.8	9.1	664	8.2	0.96	4.4	39.5	4	240	2	1	1	1	1	600	1	0	1	1	9	1		1
1007394605	0	23	0	1	1	1	2	0	1	0	1	0	1	2	0	1	1.75	0.7	428	9.3	0.3			7	120	2	2	1	1	1	400	1	0	1	1	16	1		0
19228627	1	63	0	0	1	2	2	0	0	0	1	1	1	0	2	4	7.11	4.23	161	9.5	1	1.1	12.2	5	120	2	2	1	1	1	500	1	0	1	0	30	1		1
836920002071988	0	30	0	1	1	0	2	1	1	0	1	1	1	2	0	1	3.13	1.59	443	12.4	0.58	1	11.5	7	330	2	2	1	1	1	900	1	0	1	1	11	1		0
14203087	1	70	0	0	1	0	0	0	0	0	1	1	1	0	1	1	3.2	1.76	182	3.8	1	1.1	12.8	7	220	1	1	0	1	1	200	1	0	1	1	10	1		1
1097722476	1	31	0	1	1	1	2	1	1	0	1	0	0	2	0	4	1.76	0.76	226	6.7	0.74	1.2	13.5	5	260	2	2	1	1	1	100	1	0	1	1	19	1		0
24010547	0	49	0	1	0	1	2	0	0	0	0	0	0	1	0	4	14.9	9.5	404	19.4	0.3	1.1	30.9	5	300	2	2	0	1	1	150	1	0	1	1	14	1		1
88287879	1	41	1	1	1	0	1	1	0	1	1	0	0	2	0	1	3	1.6	115	6.7	0.93	1	25.7	4	330	2	2	1	1	1	400	1	0	1	1	5	1		1
5553401	1	77	0	1	1	0	1	0	0	0	1	0	1	0	1	1	1.96	0.92		10.7	0.7	1.8	21	5	120	1	2	0	1	1	150	1	0	1	1	19	1		0
20781267	0	60	0	0	0	1	1	0	0	1	1	1	1	0	2	1	3.9	2.6	216	9.7	0.6			7	180	2	2	1	1	1	100	1	0	1	1	8	1		0
